# Supplementary material for: Measurement of the W Boson Production Cross-Section in pp Collisions at 7 TeV with the ATLAS Experiment
Source: MDPI journal article supplement (doi:10.3390/nu13124531), 2011-04-30
Supplement: s1 [file s1]

## Supplementary Material

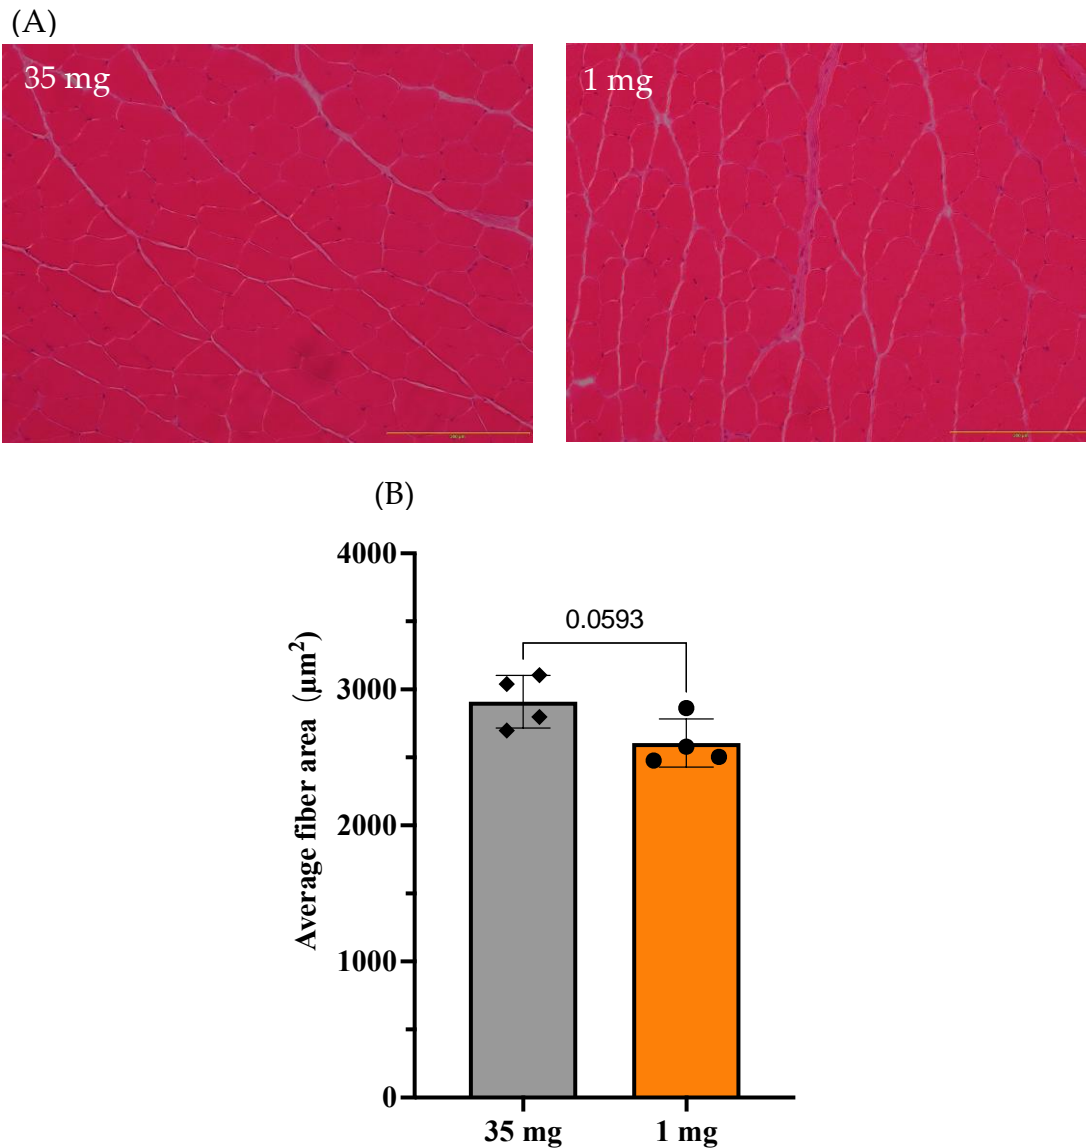

**Figure S1.** Morphology of vitamin B6-supplement and -deficient gastrocnemius (GAS) muscle cross sections. (A) Representative images depicting fiber size of myofibers from hematoxylin and eosin (H&E) stain. Scale bar 200 μm. (B) The myofiber area of muscles from mice fed the vitamin B6-deficient diet was slightly smaller ( $P = 0.0593$ ) than that from mice fed the vitamin B6-supplement diet. For H&E stains, standard staining protocols were used, and the stains were completed on GAS muscle sections. An average of 200 fibers were examined per muscle section ( $n = 4$  mice/group). Values represent the means  $\pm$  SD.  $P$  value  $< 0.05$  was considered statistically significant (unpaired t-test).
